# Supplementary material for: Why do Si quantum dots with stronger fast emission have lower external photoluminescence quantum yield?
Source: Royal Society of Chemistry journal article supplement (doi:10.1039/d3na01031g), 2024-01-01
Supplement: d3na01031g1.pdf [file d3na01031g1.pdf]

## Electronic supplementary information for: Why do Si quantum dots with a stronger short-lived component have lower external photoluminescence quantum yield?

Tomáš Popelář,<sup>a</sup> Filip Matějka,<sup>a,b</sup> Jakub Kopenec,<sup>a</sup> Giacomo Morselli,<sup>c</sup> Paola Ceroni,<sup>c</sup> and Kateřina Kůsová<sup>\*a</sup>

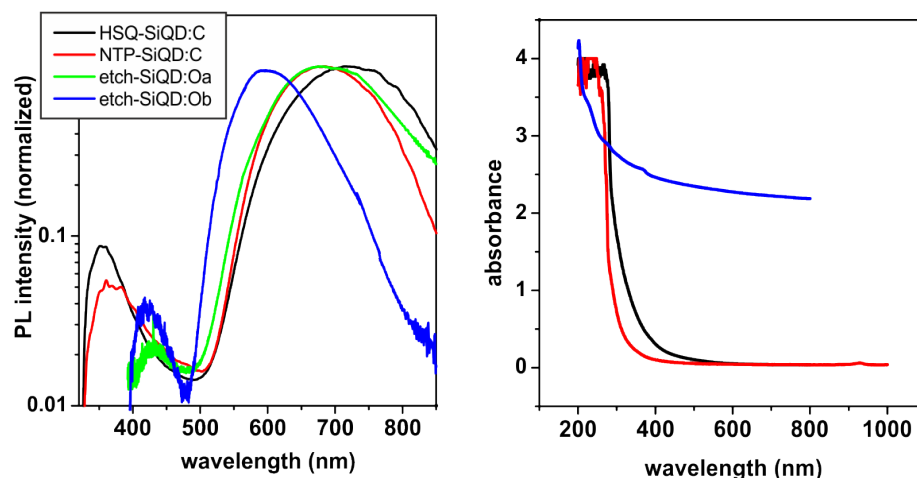

Fig. S1 Steady-state photoluminescence (left) and absorbance (right) of the studied samples under continuous 325 nm excitation. The absorbance was recalculated from transmittance measurements. Please note that larger agglomerates form in the oxidized sample (etch-SiQDs:Ob), which results in the background in the absorbance curve.

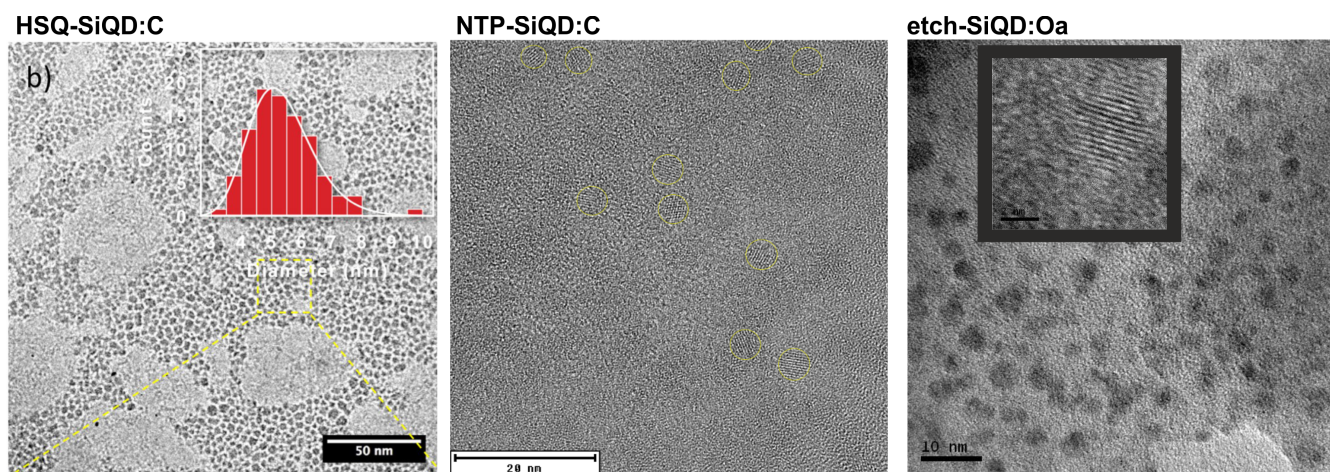

Fig. S2 HRTEMs of the studied SiQDs.

<sup>a</sup> Institute of Physics of the ASCR, v.v.i., Cukrovarnická 10, 162 00 Prague 6, Czechia, E-mail: kusova@fzu.cz

<sup>b</sup> University of Chemistry and Technology, Technická 5, 166 28 Praha 6, Czechia.

<sup>c</sup> Chemistry Department "Giacomo Ciamician", Via F. Selmi 2, University of Bologna, 40126 Bologna, Italy.
